# Supplementary material for: Myc-Dependent Genome Instability and Lifespan in Drosophila
Source: PLoS One. 2013 Sep 6;8(9):e74641. doi: 10.1371/journal.pone.0074641 (PMC3765364; doi:10.1371/journal.pone.0074641)
Supplement: Table S1 — Molecular analyses of DSB-mediated breakpoints in control and Myc overexpressing larvae. Genotype shown as “+” is hs-FLP/+ (or Y); lacZ #2; actin>CD2>Gal4, UAS-GFP/+ and genotype shown as “Myc” is hs-FLP/+ (or Y); lacZ #2; actin>CD2>Gal4, UAS-GFP/UAS-Myc. Sequence analyses was performed on a subset of plasmids previously defined as “genome rearrangements”. 21 events in control flies and 26 events in Myc overexpressing flies were found and characterized as either indels (insertion or deletion events) or as translocations (which involve sequence from another chromosome). Indels were defined as “small” (less then 10 kb) or “large” (10 kb or larger) based on our arbitrary cutoff. 50 base pairs on either side of each break point repair are shown. Microhomology is defined as 5 or more identical base pairs on either side of the breakpoint and is highlighted in bold. Locations and positions of break points are given as 5′ and 3′ unless they could not be determined from the sequence. Distance was calculated for all indels in base pairs from the breakpoint in lacZ. 1. Location of the breakpoint or position of the event when inside the lacZ reporter. 2. Position of the breakpoint(s) in the lacZ gene [27], [29]. 3. Position of the breakpoint in the Drosophila genome as inferred from the 3′ genomic sequence captured in the lacZ reporter [27], [29]. 4. Location of the breakpoint in the Drosophila genome determined by BLAST and FlyBase gene identity. 5. Distance between the breakpoint in lacZ and the genomic position of adjoining piece of DNA in base pairs. (XLSX) [file pone.0074641.s004.xlsx]

## Sheet: Sheet1
Supplementary Table 1. Somatic genome rearrangements in D. melanogaster control vs dMyc overexpression.
Genotype	Sample ID	Type of event	5' sequence at breakpoint	3' sequence at breakpoint	Location 5' breakpoint1	Position 5' breakpoint2	Position 3' breakpoint3	Location 3' breakpoint4	Distance5
+	9	indel: small	TGACTGGTACAACCCTGGCGTTACCCAACTTAATCGCCTTGCAGCACATC	CTCTAGAAAGCTTATCGATGATAAGCTGTCAAACATGAGAATTCTTGAAG	LacZ	309	3296	LacZ	2987
		indel: small	AGGACCGAAGGAGCTAACCGCTTTTTTGCCAACATGGGGGGATCATGTAA	TCAGACCCNNTAGNAAAGATCAAAGGATCTTCTTGAGATCCTTTTTTTCT	LacZ	4016	4554	LacZ	538
	20	indel: large	TAAACCGACTACACAAATCAGCGATTTCCATGTTGCCACTCGCTTTAATG	CGACGGCATTACACATCGTGTGACATCGAAACCCAGAAAAAAGCCCAGGG	LacZ	915	18645314	2L: MESR3 intron	35569
		indel: large	TTCTGCAGCTGCATCTGCAACCAACTGCAGTCGCCGGGTCTCGAAAGCTT	GAAAGCTTATCGATGATAAGCTGTCAAACATGAGAATTCTTGAAGACGAA	2L: MESR3 intron	18645904	3301	LacZ	33773
	23	indel: large	CATTTAATGTTGATGAAAGTTGGCTACAGGAAGGCCAGACGCGAATTATT	GTAAGGAAATGTACATACATATATTGTTTTGATTTTTTTTTCACATATTT	LacZ	644	20118007	2L: intragene	1508533
		indel: large	CTAAATGGAGCACTCTTGGAAGCCTTCCATTGAATGCATCTTCCAAGCTT	AAGCTTATCGATGATAAGCTGTCAAACATGAGAATTCTTGAAGACGAAAG	2L: intragene	20117684	3303	LacZ	1505551
	22	indel: small	GGTTGTTACTCGCTCACATTTAATGTTGATGAAAGTTGGCTACAGGAAGG	AAGGGCCTCGTGATACGCCTATTTTTATAGGTTAATGTCATGATAATAAT	LacZ	628	3350	LacZ	2722
	32	indel: small	GAAACAGCAATGACCATGATTACGGATTCACTGGCCGTCGTTTTACAACG	TCGTGACACGCCTATTTTTATAGGTTAATGTCATGATAATAATGGTTTCT	LacZ	257	3357	LacZ	3100
	5	indel: small	CGTCTGGGACTGGGTGGATCAGTCGCTGATTAAATATGATGAAAACGGCA	GTGCGCGGAACCCCTATTTGTTTATTTTTCTAAATACATTCAAATATGTA	LacZ	1965	3437	LacZ	1472
		indel: small	CTGAATGAAGCCATACCAAACGACGAGCGTGACACCACGATGCCTGCAGC	AAGCTTATCGATGATAAGCTGTCAAACATGAGAATTCTTGAAGACGAAAG	LacZ	4093	3302	LacZ	791
	20.1	indel: small	GAATACCTGTTCCGTCATAGCGATAACGAACTCCTGCACTGGATGGTGGC	GGTGGCACTTTTCGGGGAAATGTGCGCGGAACCCCTATTTGTTTATTTTT	LacZ	2188	3416	LacZ	1228
	38	indel: large	CGGTTACGGCCAGGACAGTCGTTTGCCGTCTGAATTTGACCTGAGCGCAT	AGACGAAATTATTTTTAAAGTTTTATTTTTAATAATTTGCGAGTACGC	LacZ	744	10955	pCasper vector	10211
		indel: small	AGACGAAATTATTTTTAAAGTTTTATTTTTAATAATTTGCGAGTACGC	AAAGCTTATCGATGATAAGCTGTCAAACATGAGAATTCTTGAAGACGAAA	pCasper vector	10908	3301	LacZ	7607
	42	indel: large	ACCGCCGACGGCACGCTGATTGAAGCAGAAGCCTGCGATGTCGGTTTCCG	GTATCTATCTATATCTATCTATCTATATCAATCTATCTATATCAATCTTC	LacZ	1216	16253814	2L: prl-1 intron	2367371
	1	indel: small	ACGCCCACGCGATGGGTAACAGTCTTGGCGGTTTCGCTAAATACTGGCAG	CTGGCAGCAGTGGCGTCTGGCGGAAAACCTCAGTGTGACGCTCCCCGCCG	LacZ	1880	2365	LacZ	485
	2	indel: small	GTTCACCCGTGCACCGCTGGATAACGACATTGGCGTAAGTGAAGCGACCC	ACCCCTATTTGTTTATTTTTCTAAATACATTCAAATATGTATCCGCTCAT	LacZ	2616	3445	LacZ	829
	4	indel: small	GCGGTGGTTGAACTGCACACCGCCGACGGCACGCTGATTGAAGCAGAAGC	AAGCTTATCGATGATAAGCTGTCAAACATGAGAATTCTTGAAGACGAAAG	LacZ	1198	3303	LacZ	2105
	6	indel: small	CAAGCCGTTGCTGATTCGAGGCGTTAACCGTCACGAGCATCATCCTCTGC	GTGGACAGAGAAGGAGGCAAACAGCGCTGACTTTGAGTGGAATGTCATTT	LacZ	1305	pCasper 4511 (-2296)	pCasper	3601
		indel: small	GGGTTTTATTAACTTACATACATACTAGAATTCGAGCTCGCCCGGGGATC	CTCTAGAAAGCTTATCGATGATAAGCTGTCAAACATGAGAATTCTTGAAG	pCasper vector	pCasper 5038 (-1769)	2995	LacZ	4764
	19	translocation	TAACGCCGTGCGCTGTTCGCATTATCCGAACCATCCGCTGTGGTACACGC	CGGTTAGTTATCAGGTTCTCTTTAAATTTTCCTGACCATTTCGAGTTTTT	LacZ	1419	162203	3L:p130CAS intron	N/A
		translocation	AGAGAAACTAGTATTAATTTCCATCAGTCTTCGGTGTGCTGAAAAAGCTT	AAAGCTTATCGATGATAAGCTGTCAAACATGAGAATTCTTGAAGACGAAA	3L: p130CAS intron	162564	3302	LacZ	N/A
Myc	9	indel: small	TGGGATCTGCCATTGTCAGACATGTATACCCCGTACGTCTTCCCGAGCGAAAA	ACAGGCGTTGGGAGACCCTCGTTTTATGGGCTGATAAAAGGACTTGGCAG	LacZ	3022	18618424	2L: MESR3 intron	6572
	23	indel: large	CGCCGTGCGCTGTTCGCATTATCCGAACCATCCGCTGTGGTACACGCTGT	TTGCATGTGCAATCAGTGGAAAGTAGCGTAAAAAATGAAAATATTGACAAG	LacZ	1422	18632604	2L: MESR3 intron	22352
	49	indel: large	TTGCAGTGCACGGCAGATACACTTGCTGATGCGGTGCTGATTACGACCGC	AAAACAAACAAATTCAATCCACTATATACTATATTCACCTTTTAAAATAT	LacZ	2734	18591607	2L: CG15160 intron	31096
	55	indel: large	CGTCCCCTCAAACTGGCAGATGCACGGTTACGATGCGCCCATCTACACCA	TGGCAAAAAGTTCTGGCGTTGCTGGCTGGAGGATGAGGTAGATGATGCTC	LacZ	523	18679856	2L: CG31751 intron, tosca exon	70503
		indel: large	unknown	TTTTCCGTGACGTCTCGTTGCTGCTAAACCGACTACAGAAATCAGCGATT	unknown	2L: unknown	841	LacZ	unknown
	90	translocation	TTTATCCGGGCAAACCATCGAAGTGACCAGCGAATACCTGTTCCGTCATA	ACTATGACAAGCAGAATCACACCCAACAGGCTTGCGTCTCTCTTAAAACA	LacZ	2158	25689055	3R: rps8 intron, snoRNA ME28S-A2564	N/A
		translocation	GACGGGAGACCTTATGGAGGGAACGATATATTTATCAGTAGTCCGAACAT	AAAGCTTATCGATGATAAGCTGTCAAACATGAGAATTCTTGAAGACGAAA	3R: rps8 intron, snoRNA OR-CD8	25688400	3301	LacZ	N/A
	92	indel: large	CTGCTGACGCCGCTGCGCGATCAGTTCACCCGTGCACCGCTGGATAACGA	TCAATAACTCCCTTGATGGTATATTCAGTTTGATTGGGCACCTGCTCCAC	LacZ	2593	18682907	2L: 31751 exon	71484
	1	indel: large	CCCGGTGCAGTATGAAGGCGGCGGAGCCGACACCACGGCCACCGATATTAT	GTGGACCTCAATCTTATGCTGGCTATGACTTCCTCCATTGTTCTCCTTAC	LacZ	1714	18676574	2L: Mst 36Fa exon	66030
	2	indel: small	TGGTGCAGCGCGATCGTAATCACCCGAGTGTGATCATCTGGTCGCTGGGG	GGCCAACTTACTTCTGACAACGATCGGAGGACCGAAGGAGCTAACCGCTT	LacZ	1595	3940	LacZ	2345
		indel: small	TGAATGAAGCCATACCAAACGACGAGCGTGACACCACGATGCCTGCAGCC	AAGCTTATCGATGATAAGCTGTCAAACATGAGAATTCTTGAAGACGAAAG	LacZ	4092	3303	LacZ	789
	3	indel: large	GTGGTGCAACGGGCGCTGGGTCGGTTACGGCCAGGACAGTCGTTTGCCGT	ATCGGTCAAATTTCATATCTTATTCTGGATAACTAAAATCACATTGAAGT	LacZ	723	18642928	2L: MESR3 intron	33375
	4	translocation	TGGCGTTACCCAACTTAATCGCCTTGCAGCACATCCCCCTTTCGCCAGTT	AGCACACGTCGCCGCAATATTCTCTACCTAATGCACCGATATCTGGTGGA	LacZ	324	3210238	X: dunce intron, CG 10793 exon	N/A
	5	indel: large	GACGCGCGAATTGAATTATGGCCCACACCAGTGGCGCGGCGACTTCCAGT	GTGATTCGTCCTCTTCTGGCTTTTCATCTTCTACTTCGCCTTCTTTTTGT	LacZ	3087	18610806	2L: Atac2 exon	12250
	6	indel: large	CTTACGGCGGTGATTTTGGCGATACGCCGAACGATCGCCAGTTCTGTATG	GGCTACAAATTTGCCACTAATTGCAGCTGGCGGAGGATTCAAAAAACTCA	LacZ	2027	18642447	2L: MESR3 intron	31590
	7	indel: large	GTCGATCCTTCCCGCCCGGTGCAGTATGAAGGCGGCGGAGCCGACACCAC	AAGCGCCGCTCACGAATATCTCTGTGCCCAATCCGCCGAAGAAACTCTCC	LacZ	1699	18660533	2L: MESR3 intron	50004
	8	indel: large	GACTACCTACGGGTAACAGTTTCTTTATGGCAGGGTGAAACGCAGGTCGC	TGCTCAAGGGCTCGAAGCCCAGAAACGTGAGTCGAATTGCAGAGTGCGAA	LacZ	1021	18641147	2L: MESR3 intron	31296
		indel: large	unkown	TTCGGGGCGTTAACCGTCACGAGCATCATCCTCTGCATGGTCAGGTCATG	2L: unknown	2L: unknown	1269	LacZ	unknown
		indel: small	GTTCACCCGTGCACCGCTGGATAACGACATTGGCGTAAGTGAAGCGACCC	CTATTTGTTTATTTTTCTAAATACATTCAAATATGTATCCGCTCATGAGA	LacZ	2616	3445	LacZ	829
	9	indel: large	GTTCGCATTATCCGAACCATCCGCTGTGGTACACGCTGTGCGACCGCTAC	AAACAACAACATCCGCTTATCGCGATAAATCAAAGCCACGAGTGTTGTTA	LacZ	1433	18647526	2L: MESR3 intron	37263
		indel: large	AATTATCAACTCCGCGGAGAGATACGCAGATGAAGATATTAACTAAGCTT	AAGCTTATCGATGATAAGCTGTCAAACATGAGAATTCTTGAAGACGAAAG	2L: MESR3 intron	18647118	3303	LacZ	34985
	13	indel: large	GGAGAGACGCGCCCGCTGATCCTTTGCGAATACGCCCACGCGATGGGTAA	AAAGAAAAATAACAACAATCAGTCAGTTCTTACCGTCAAATATCAATAAG	LacZ	1849	14403277	2L: elbow B intron	4218541
		indel: large	CGAATCATTTATACTGACCTACAAATTGCACTGCCTTAAAGGCAAGCTTA	AAGCTTATCGATGATAAGCTGTCAAACATGAGAATTCTTGAAGACGAAAG	2L: elbow B intron	14403400	3303	LacZ	4219872
	59	indel: large	CGTTTCTTCCCACGGAGAATCCGACGGGTTGTTACTCGCTCACATTTAAT	AACTAATTTTCCGAACGGCAACAAAGTCAATTTTCCATCTAATCCGAAA	LacZ	602	18645288	2L: MESR3 intron	35856
		indel: small	TGGGAACATCAGATTGATAGCGTCGCTAAACAACACAATACTGAAAGACC	TGCACATTATATTTGAAATACTTAGTATCTCACAAAGGTTAGGAGGATTA	2L: MESR3 intron	18644977	18645639	2L: MESR3 intron	662
		indel: large	GTTCCCACTTCTGCAGCTGCATCTGCAACCAACTGCAGTCGCCGGGTCTC	GAAAGCTTATCGATGATAAGCTGTCAAACATGAGAATTCTTGAAGACGA	2L: MESR3 intron	18645896	3297	LacZ	33769

## Sheet: Sheet2
CONTROL	indel: small	2987
	indel: small	538
	indel: large	35569
	indel: large	33773
	indel: large	1508533
	indel: large	1505551
	indel: small	2722
	indel: small	3100
	indel: small	1472
	indel: small	791
	indel: small	1228
	indel: large	10211
	indel: small	7607
	indel: large	2367371
	indel: small	485
	indel: small	829
	indel: small	2105
	indel: small	3601
	indel: small	4764
	translocation	N/A
	translocation	N/A
		289118	671262
dMyc	indel: small	6572
	indel: large	22352
	indel: large	31096
	indel: large	70503
	indel: large
	translocation
	translocation					control	289118	671262
	indel: large	71484				dMyc	429117	1.22985e+06
	indel: large	66030
	indel: small	2345
	indel: small	789
	indel: large	33375
	translocation
	indel: large	12250
	indel: large	31590
	indel: large	50004
	indel: large	31296
	indel: large
	indel: small	829
	indel: large	37263
	indel: large	34985
	indel: large	4218541
	indel: large	4219872
	indel: large	35856
	indel: small	662
	indel: large	33769
		429117	1.22985e+06
